# Supplementary material for: Hyperspectral Imaging with Active Illumination: A Theoretical Study on the Use of Incandescent Lamp and Variable Filament Temperature
Source: MDPI journal article supplement (doi:10.3390/s23239326), 2023-11-22
Supplement: s1 [file s1]

Reconstructed reflectivity spectra, together with original spectra for all parameter variations within the sensitivity analysis

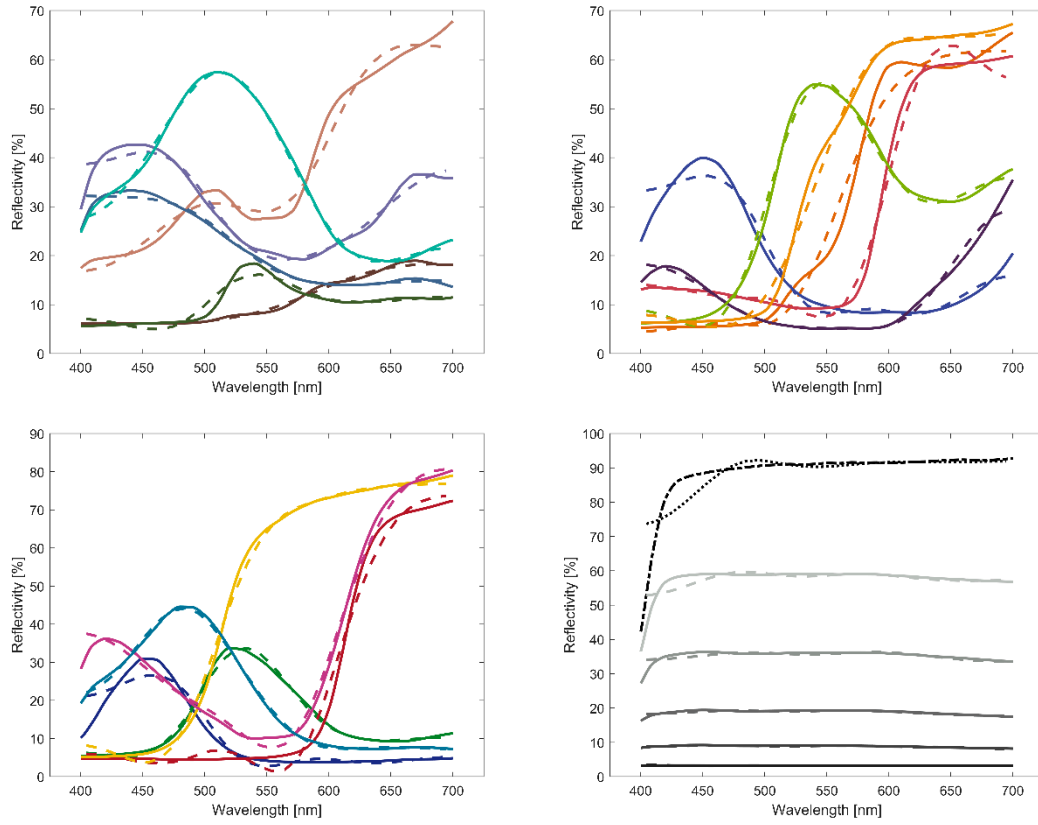

Figure 1: Reconstructed reflectivity spectra for  $SNR=1000$ .

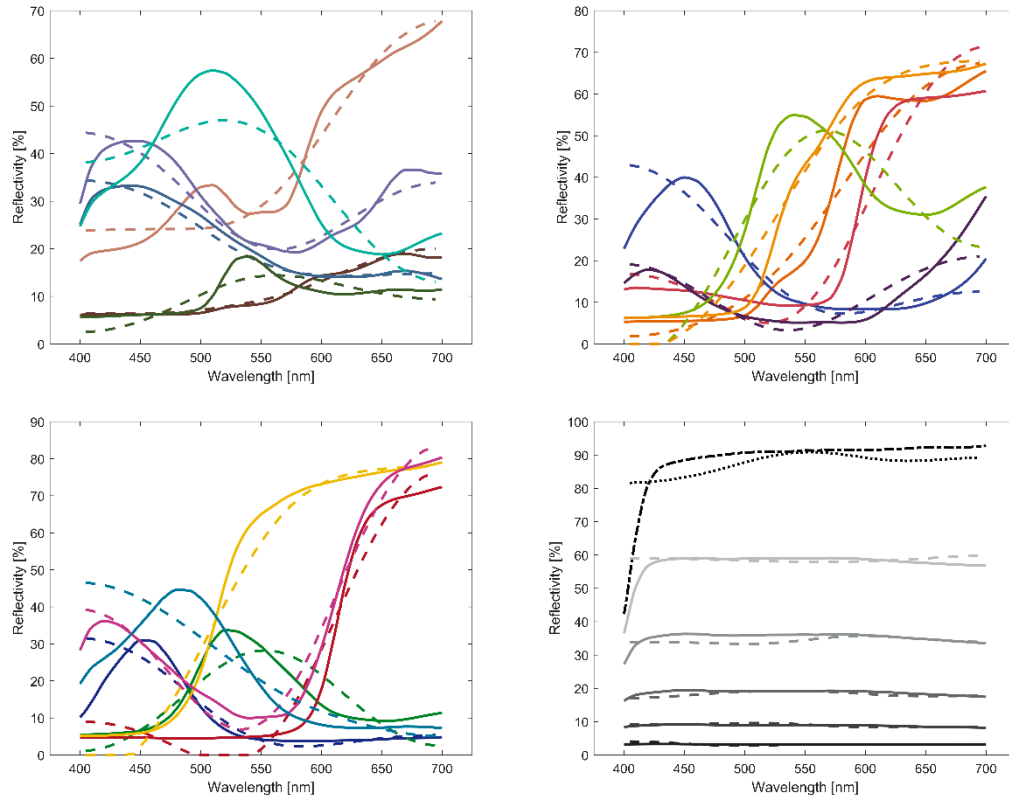

Figure 2: Reconstructed reflectivity spectra for  $SNR=10$ .

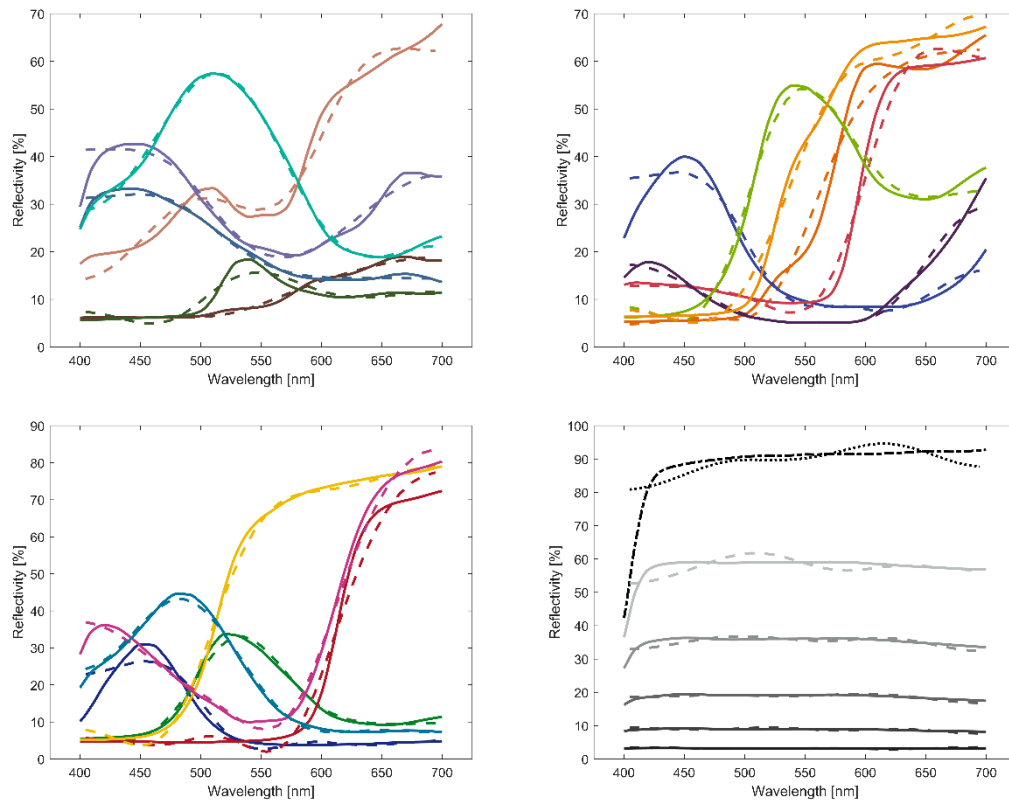

Figure 3: Reconstructed reflectivity spectra for  $\Delta T=10K$ .

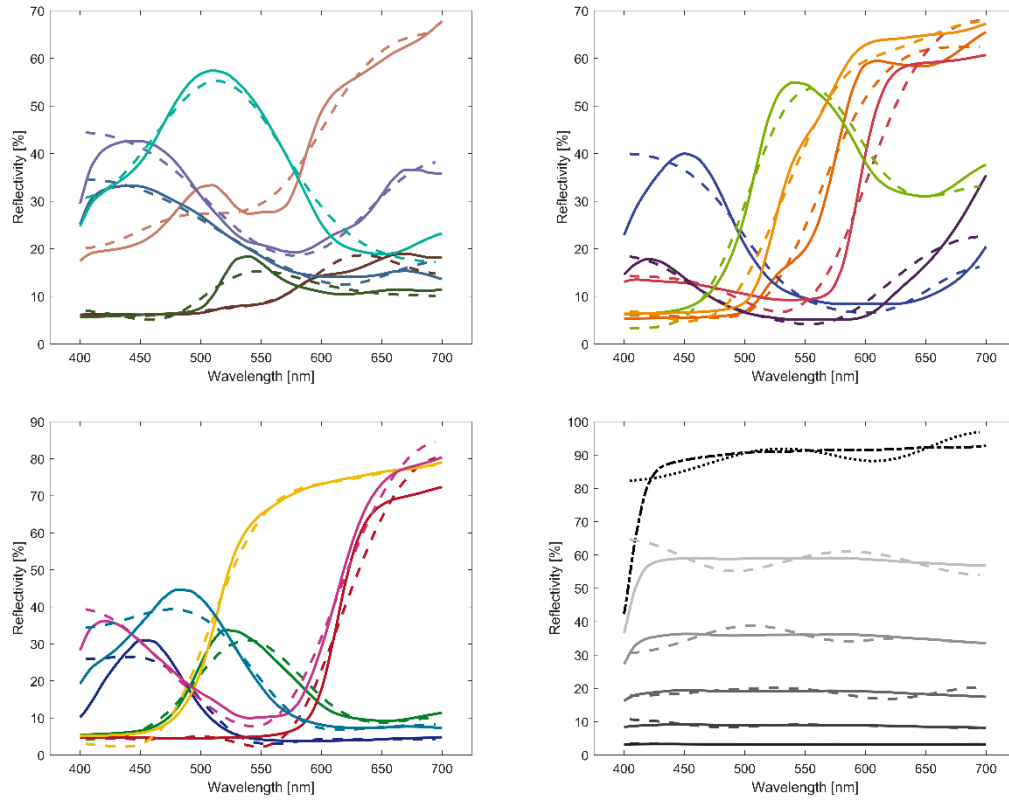

Figure 4: Reconstructed reflectivity spectra for  $\Delta T=100K$ .

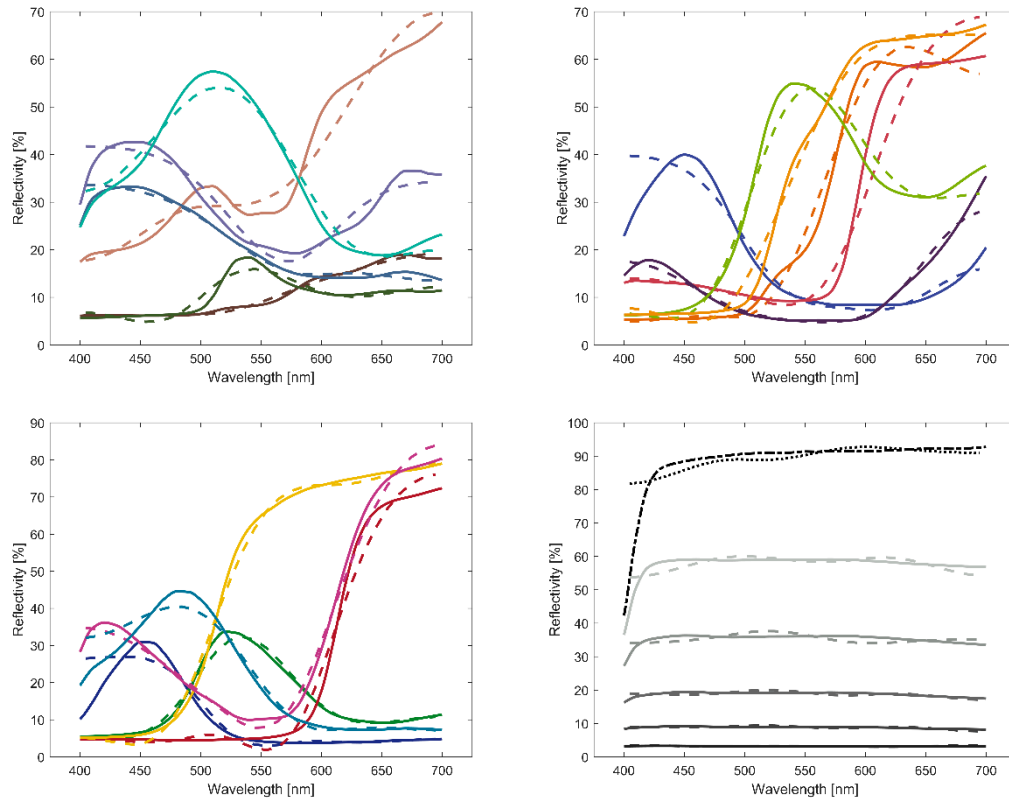

Figure 5: Reconstructed reflectivity spectra for  $T_{min}=1950K$ .

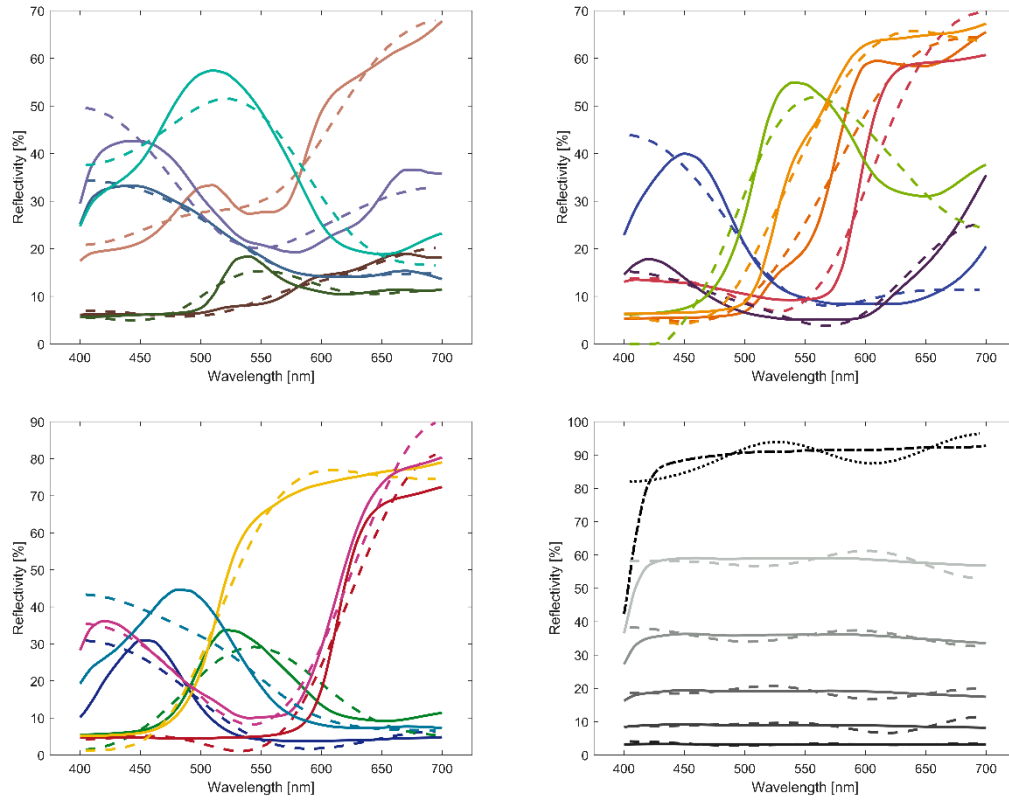

Figure 6: Reconstructed reflectivity spectra for  $T_{\max}=2950K$ .

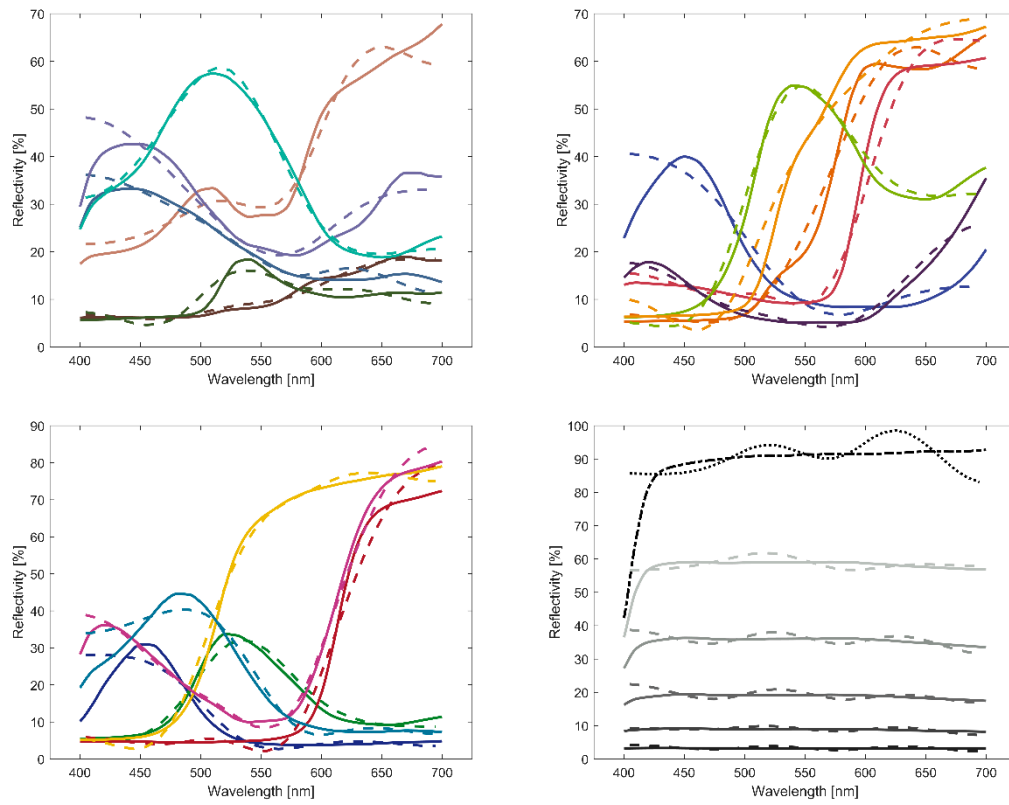

Figure 7: Reconstructed reflectivity spectra for  $\delta T=10K$ .

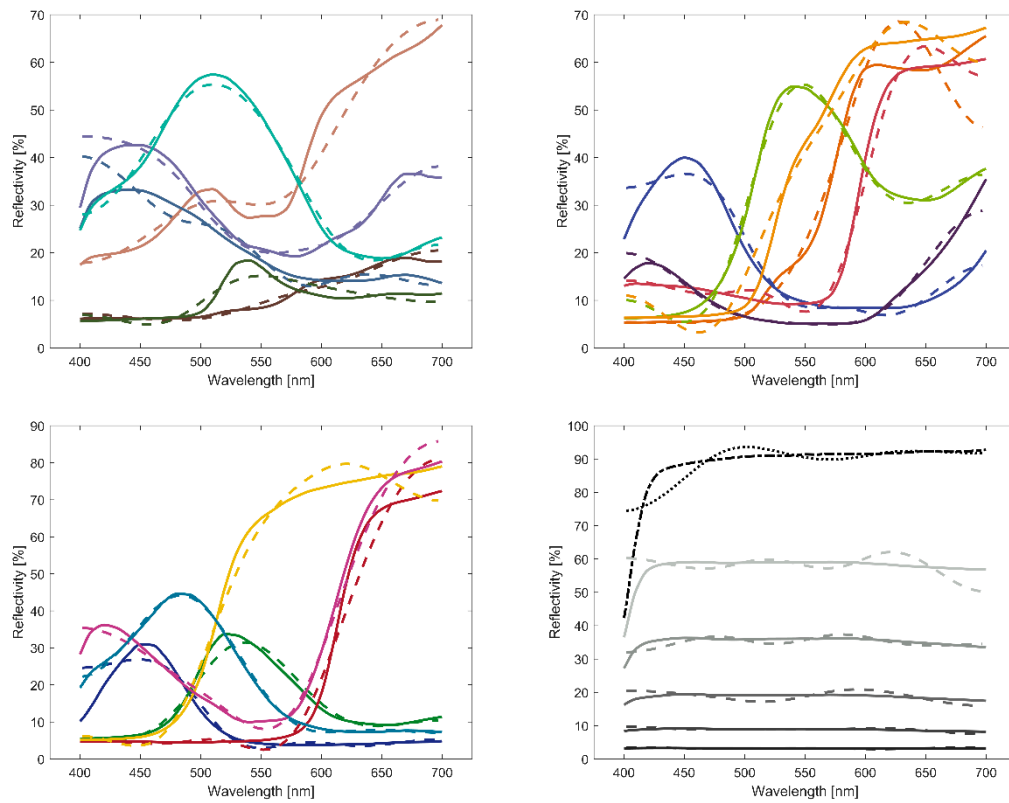

Figure 8: Reconstructed reflectivity spectra for  $\Delta\lambda=5\text{nm}$ .

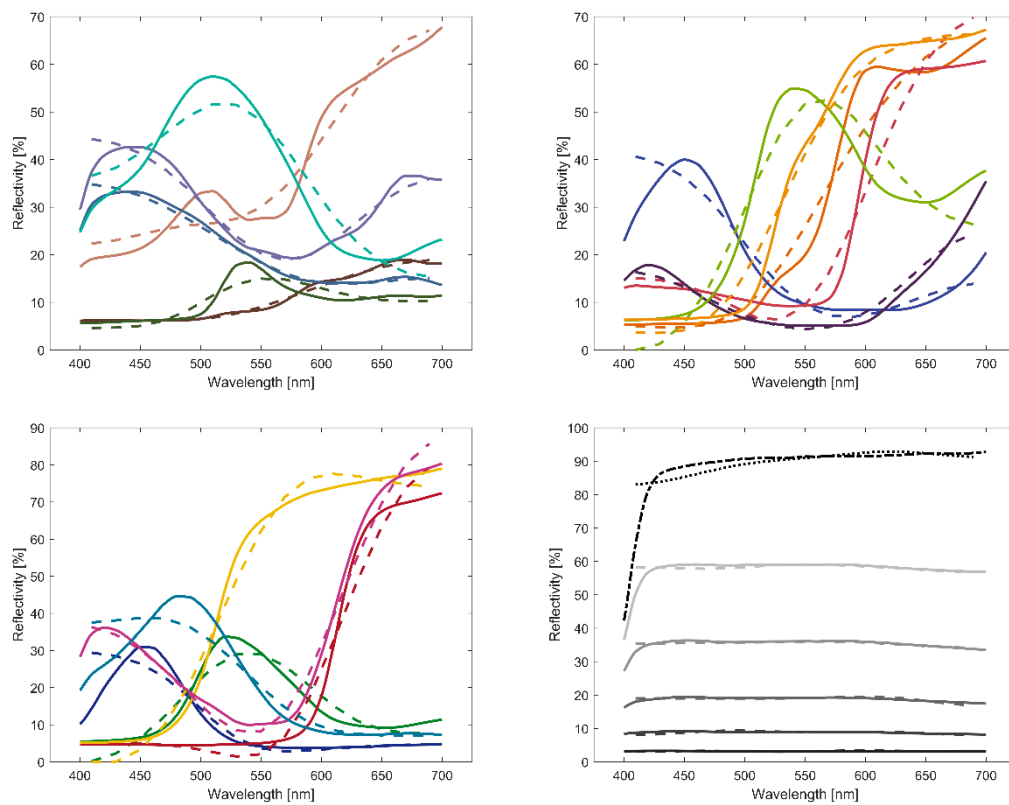

Figure 9: Reconstructed reflectivity spectra for  $\Delta\lambda=20\text{nm}$ .

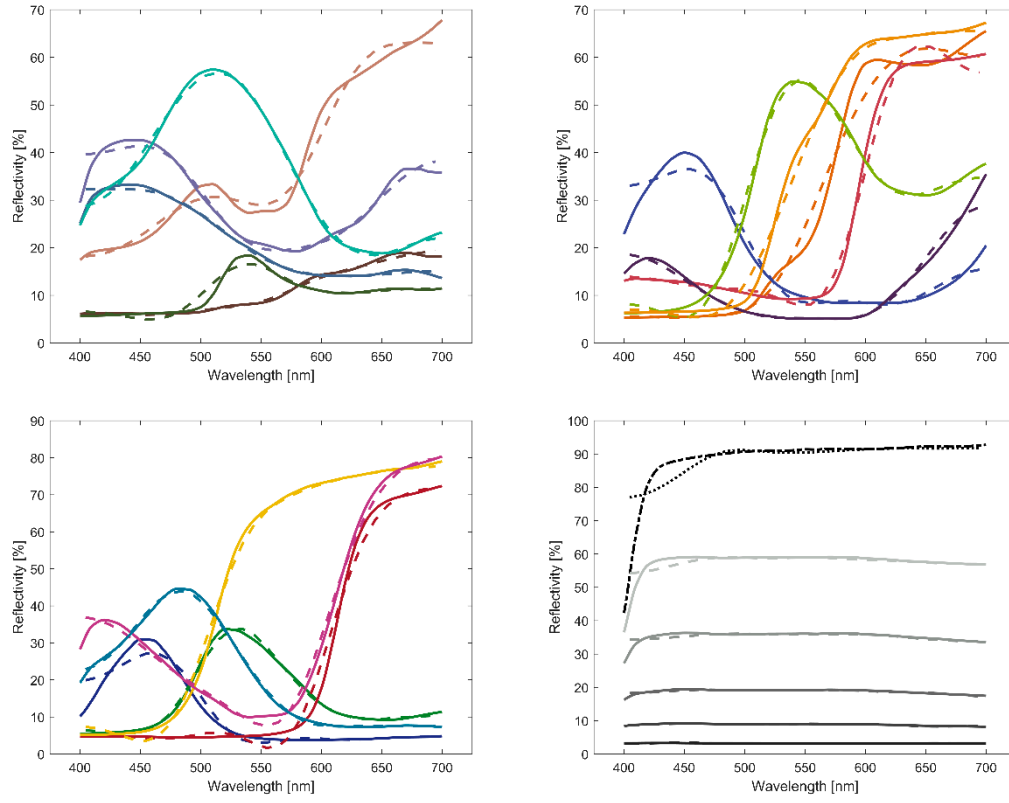

Figure 10: Reconstructed reflectivity spectra for  $N=6$  acquisition channels.
